# Supplementary material for: A Molecular-Modeling Toolbox Aimed at Bridging the Gap between Medicinal Chemistry and Computational Sciences
Source: Int J Mol Sci. 2013 Jan 4;14(1):684–700. doi: 10.3390/ijms14010684 (PMC3565289; doi:10.3390/ijms14010684)
Supplement: Supplementary file 1 [file ijms-14-00684-s001.pdf]

## Supplementary Information

**Figure S1.** Comparison between experimental (horizontal axis) and predicted (vertical axis) pK values for (a) and (b) scramble tests, and (c) additional set of test compounds. Points represent training (black) and test (red) compounds. Cross-validation and prediction coefficients are given as q<sub>2</sub> and p<sub>2</sub>, respectively.

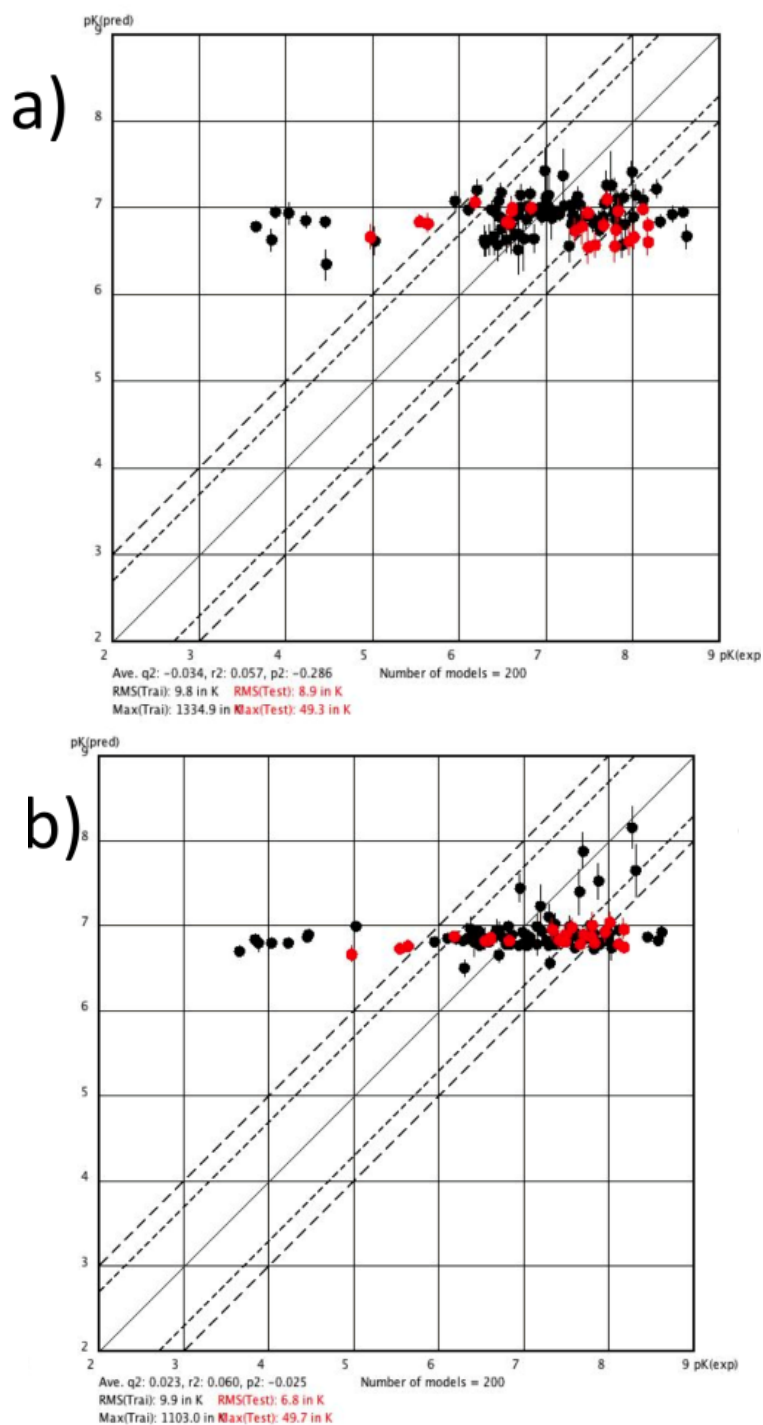

Figure S1. *Cont.*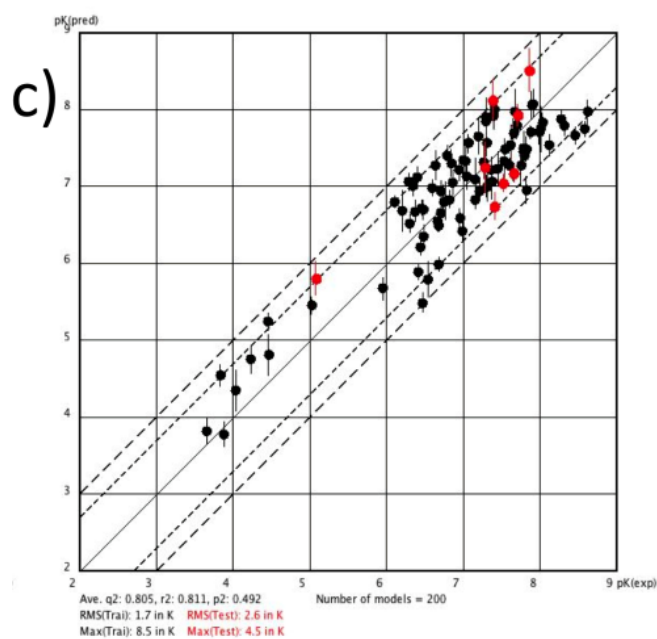

© 2013 by the authors; licensee MDPI, Basel, Switzerland. This article is an open access article distributed under the terms and conditions of the Creative Commons Attribution license (<http://creativecommons.org/licenses/by/3.0/>).
